# Supplementary material for: On the Anticataractogenic Effects of L‐Carnosine: Is It Best Described as an Antioxidant, Metal‐Chelating Agent or Glycation Inhibitor?
Source: Hindawi journal article supplement (doi:10.1155/2016/3240261), 2016-01-01

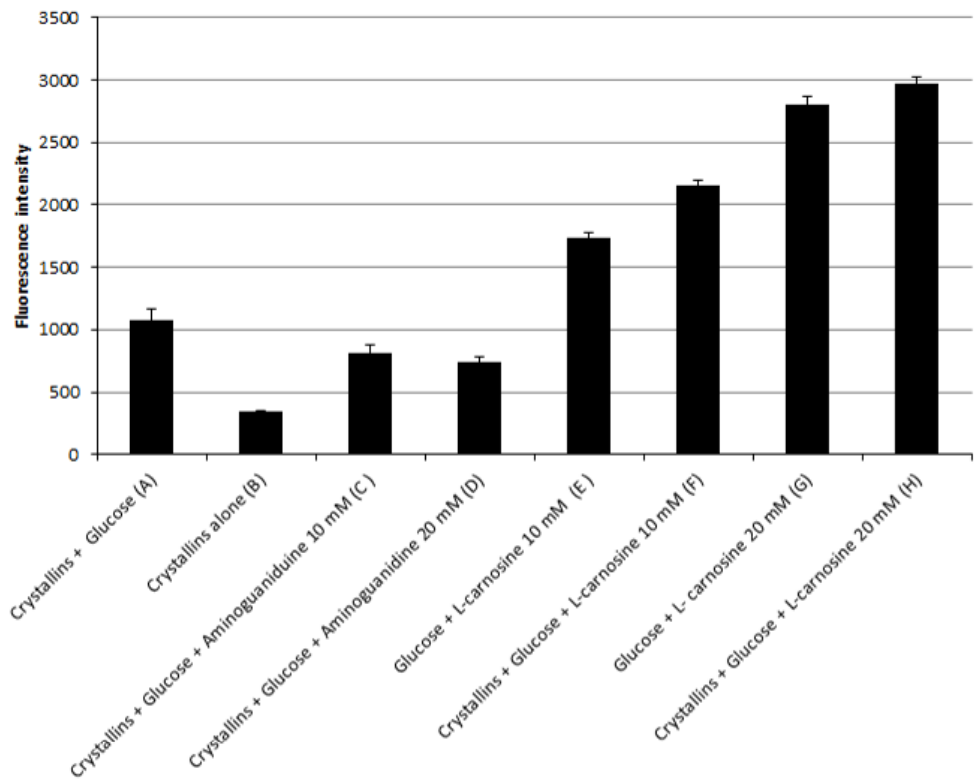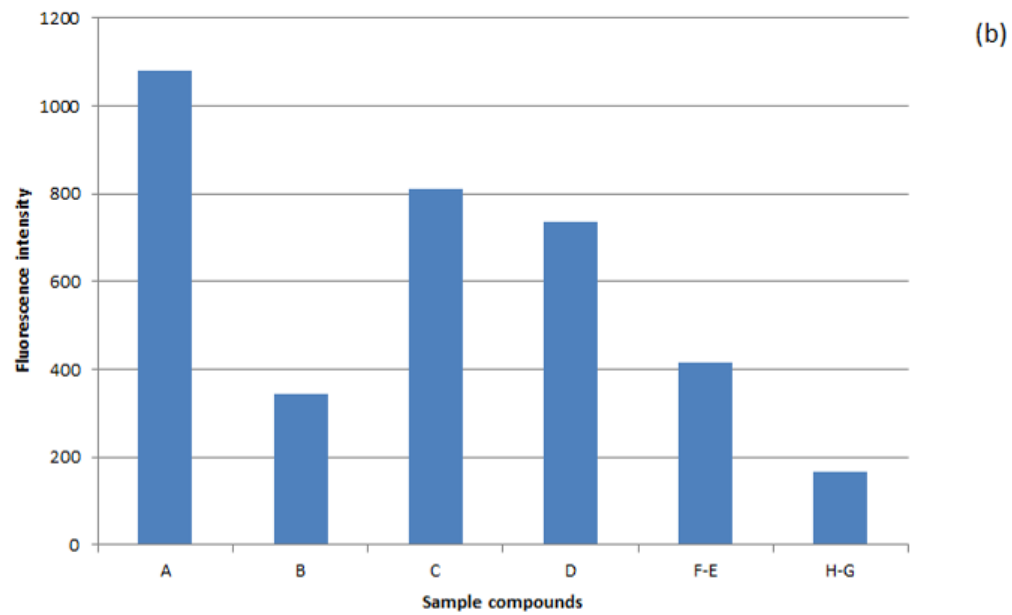

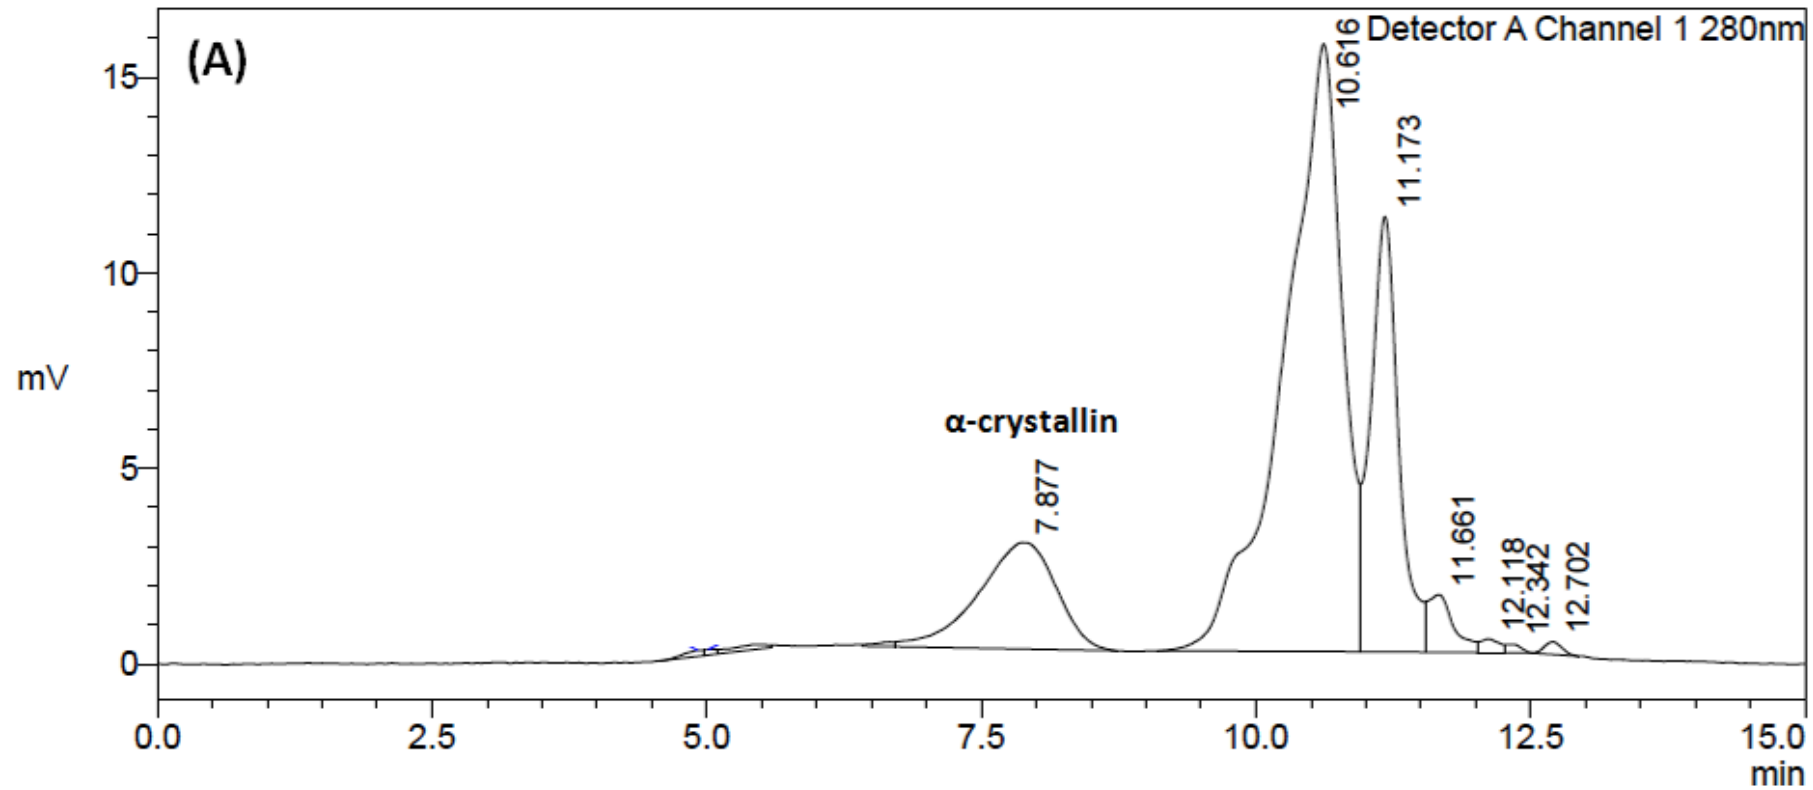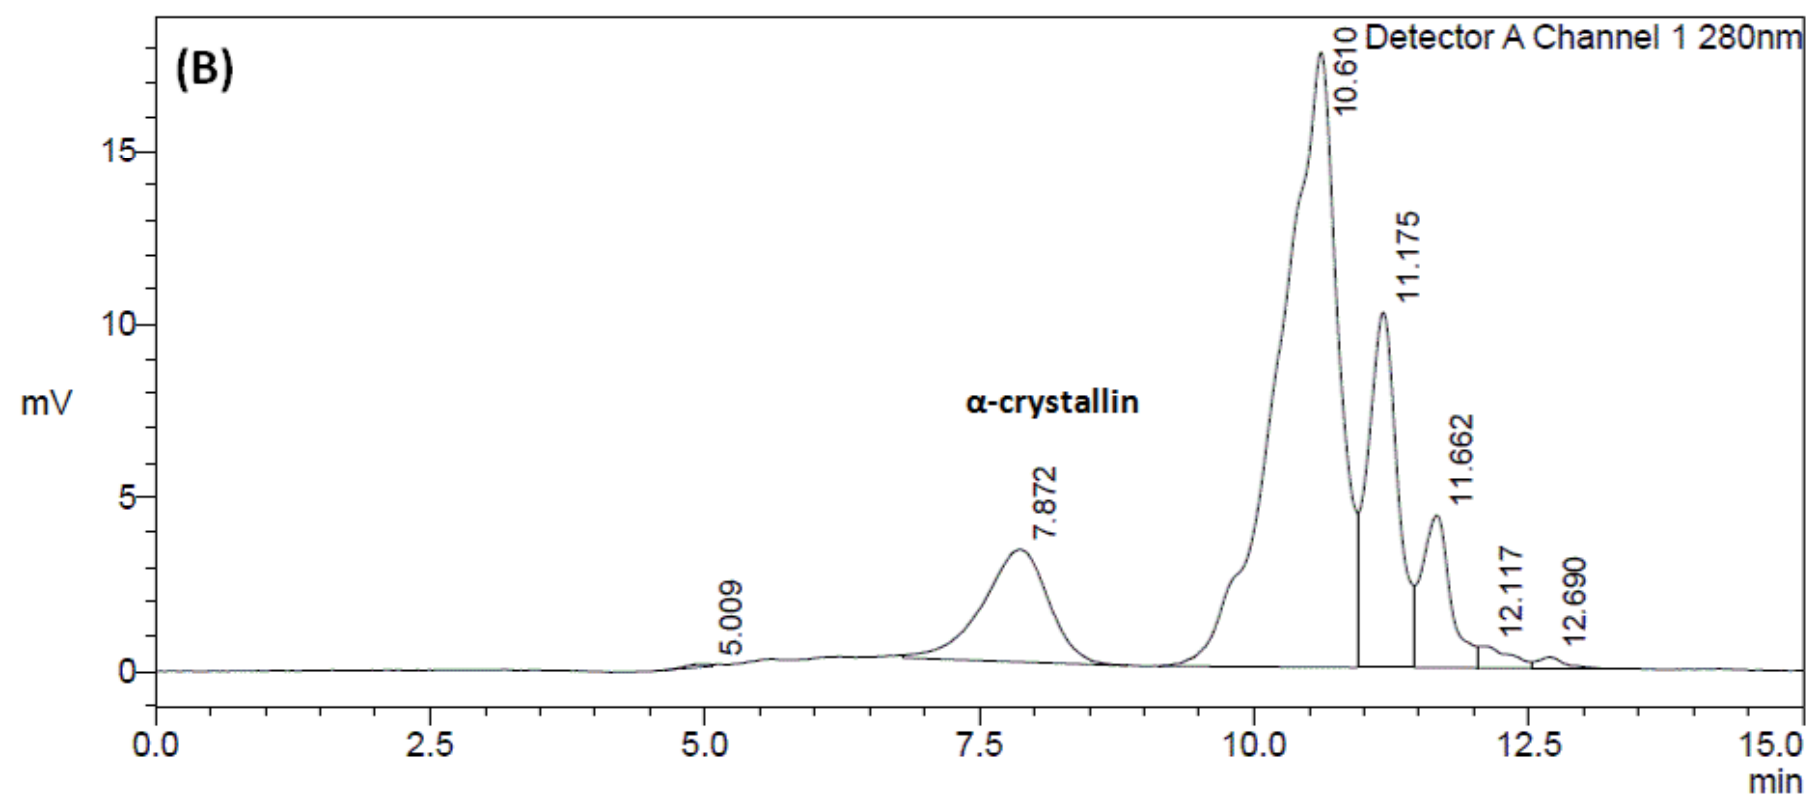

Supplement: f1 [file 3240261.f1.pdf]
